# Supplementary material
Source: publisher site journal article supplement (https://www.dovepress.com/article/433433)
Supplement: Supplementary file 1 [file get_supplementary_file.php]

**Supplementary Table 1** Relative abundance of phyla following the therapy

| Phylum | Post-therapy | Pre-therapy | *P*-values |
| --- | --- | --- | --- |
| Firmicutes | 52.313 | 52.996 | 0.838 |
| Bacteroidetes | 34.358 | 33.451 | 0.779 |
| Proteobacteria | 7.927 | 6.930 | 0.538 |
| Actinobacteria | 4.890 | 5.510 | 0.673 |
| Fusobacteria | 0.355 | 0.472 | 0.671 |
| Verrucomicrobia | 0.135 | 0.624 | 0.272 |

**Supplementary Table 2** Relative abundance of top twenty genera following the therapy

| Genus | Post-therapy | Pre-therapy | *P*-values |
| --- | --- | --- | --- |
| *Escherichia-Shigella* | 3.858 | 1.768 | 0.013 |
| *Lachnospiraceae_NK4A136_group* | 0.398 | 0.063 | 0.051 |
| *Lachnoclostridium* | 0.951 | 1.874 | 0.157 |
| *Coprococcus_2* | 0.242 | 0.084 | 0.212 |
| *[Eubacterium]_coprostanoligenes_group* | 0.383 | 0.238 | 0.236 |
| *Intestinibacter* | 0.030 | 0.010 | 0.248 |
| *Ruminococcaceae_UCG-002* | 0.296 | 0.163 | 0.261 |
| *Megamonas* | 0.123 | 0.575 | 0.265 |
| *Akkermansia* | 0.139 | 0.645 | 0.268 |
| *Bifidobacterium* | 1.798 | 2.679 | 0.268 |
| *Tyzzerella_4* | 0.411 | 0.077 | 0.270 |
| *Clostridium_sensu_stricto_1* | 0.224 | 0.448 | 0.271 |
| *Lactobacillus* | 0.146 | 1.189 | 0.281 |
| *Haemophilus* | 0.055 | 0.323 | 0.282 |
| *Atopobium* | 0.566 | 0.257 | 0.288 |
| *Parasutterella* | 0.128 | 0.301 | 0.289 |
| *Incertae_Sedis* | 0.115 | 0.062 | 0.298 |
| *Anaerostipes* | 0.577 | 0.874 | 0.311 |
| *Corynebacterium* | 0.026 | 0.003 | 0.314 |
| *Murdochiella* | 1.012 | 0.638 | 0.322 |
